# Supplementary material
Source: Springer Nature journal article supplement (https://www.springermedizin.de/resource/supplementary/12967_2007_192_MOESM3_ESM.pdf/9575900)

a) sVEGFR-2

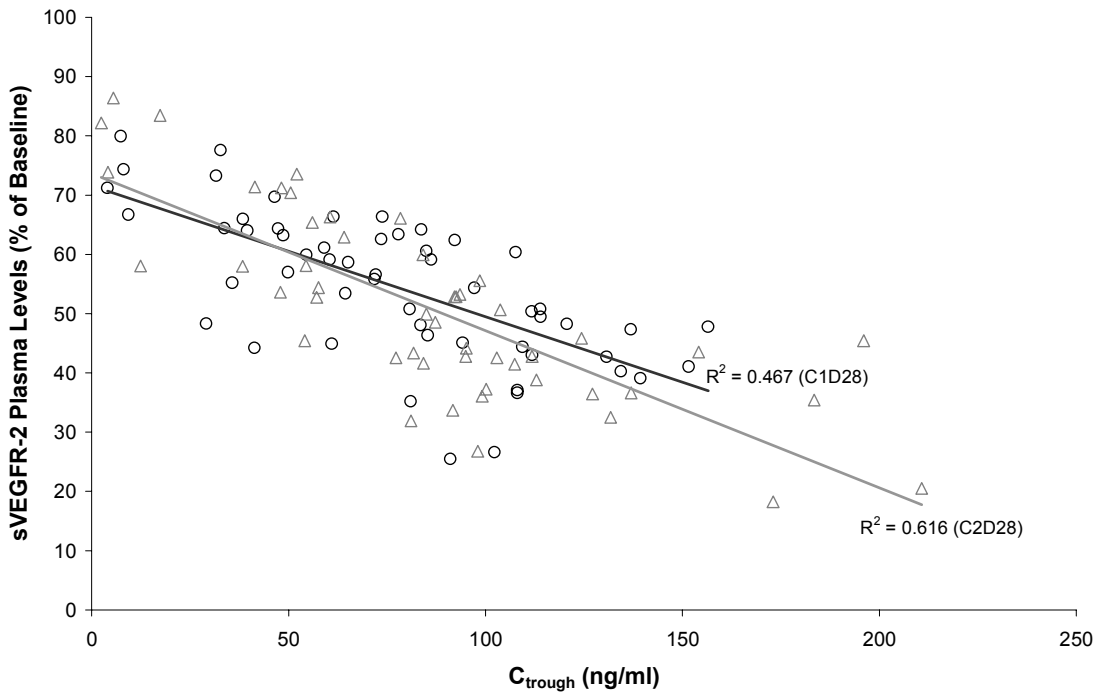

b) sVEGFR-3

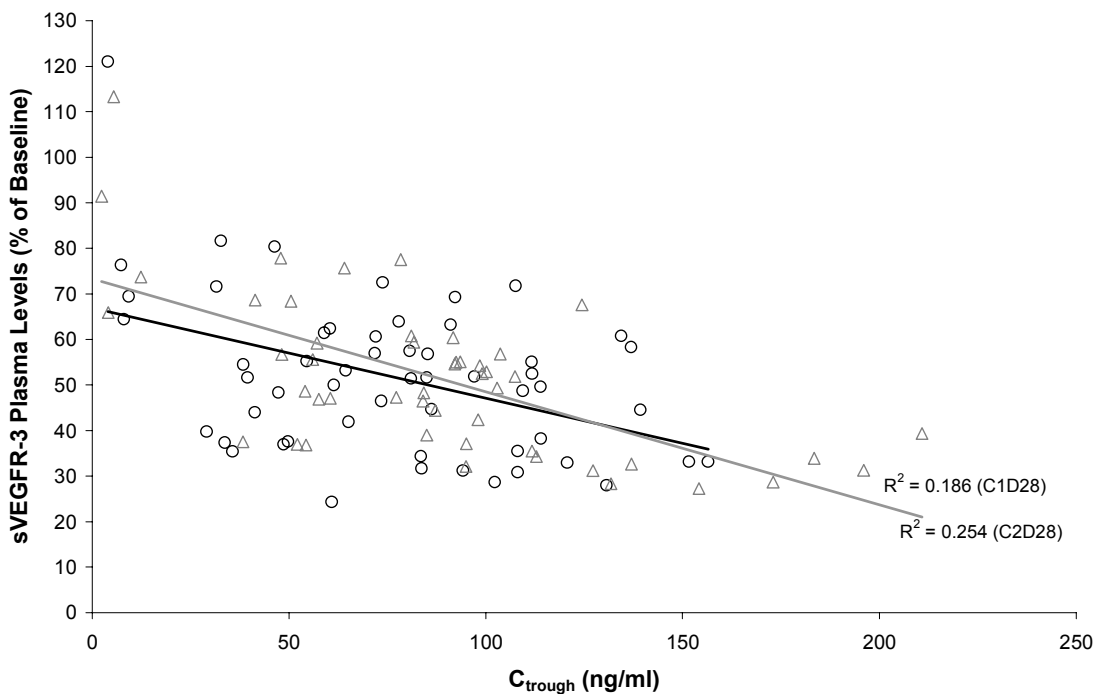

Supplement: MOESM3 [file 9575900]
